# Supplementary material for: Aqueous citrato-oxovanadate(iv) precursor solutions for VO2: synthesis, spectroscopic investigation and thermal analysis
Source: Royal Society of Chemistry journal article supplement (doi:10.1039/c4dt01346h), 2014-01-01
Supplement: c4dt01346h1.pdf [file c4dt01346h1.pdf]

# SUPPLEMENTARY INFORMATION

## Aqueous citrato-oxovanadate(IV) solutions for VO<sub>2</sub>: synthesis, spectroscopic investigation and thermal analysis

N. Peys<sup>a,b</sup>, P. Adriaensens<sup>c</sup>, S. Van Doorslaer<sup>d</sup>, S. Gielis<sup>a,e</sup>, E. Peeters<sup>a</sup>,  
C. De Dobbelaere<sup>a</sup>, S. De Gendt<sup>b,f</sup>, A. Hardy<sup>a,e</sup>, M. K. Van Bael<sup>a,e</sup>

<sup>a</sup>Hasselt University, Institute for Materials Research, Inorganic and Physical Chemistry, Diepenbeek, Belgium

<sup>b</sup>IMEC vzw, Heverlee, Belgium

<sup>c</sup>Hasselt University, Institute for Materials Research, Applied and Analytical Chemistry, Diepenbeek, Belgium

<sup>d</sup>University of Antwerp, Department of Physics, BIMEF Laboratory, Antwerp, Belgium

<sup>e</sup>IMEC vzw, Division IMOMEC, Diepenbeek, Belgium

<sup>f</sup>KULeuven, Lab for Physical and Analytical Chemistry, Heverlee, Belgium

### Spectroscopic investigation of the (NH<sub>4</sub>)<sub>2</sub>C<sub>2</sub>O<sub>4</sub>·xH<sub>2</sub>O precipitate

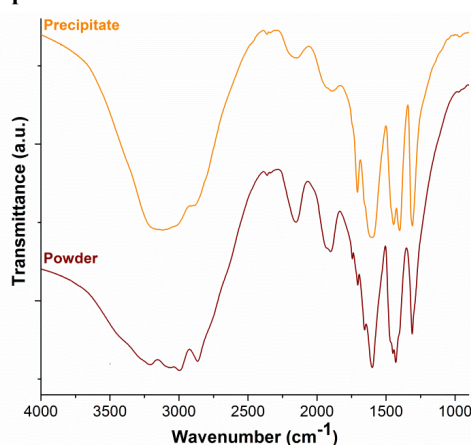

Figure S1: FTIR spectra of the precipitate originating from the synthesis of the aqueous citrato-VO<sup>2+</sup> precursor solution, and the powder obtained from the vanadium free, ammonium oxalate solution.

Figure S1 shows the FTIR spectra of the precipitate, originating from the synthesis of the aqueous citrato-VO<sup>2+</sup> precursor solution, and of the vanadium free, ammonium oxalate powder. The assignment of the main vibrations is given Table S2. Both infrared spectra show a strong absorption band between 3200 and 2800 cm<sup>-1</sup> due to the O-H stretching mode of the hydrates and the N-H stretching mode of the ammonium ion, broadened by H-bridge formation. Additional N-H stretching modes of the ammonium ion can be observed in both spectra at about 2150 and 1900 cm<sup>-1</sup>. Typical carboxylate stretch vibrations in (NH<sub>4</sub>)<sub>2</sub>C<sub>2</sub>O<sub>4</sub> appear at 1710, 1655 and 1605 cm<sup>-1</sup> for ν<sub>as</sub>(COO<sup>-</sup>) and at 1450 and 1410 cm<sup>-1</sup> for ν<sub>s</sub>(COO<sup>-</sup>).<sup>1-4</sup> Frost et al. explains the multiplicity of bands by the structural variety of oxalate species in ammonium oxalate (i.e. mono-, di- and polyoxalates).<sup>2</sup> Furthermore, the band at 1410 cm<sup>-1</sup> coincides with the ammonium deformation. The intense absorption peak observed at 1315 cm<sup>-1</sup> corresponds to the O-C=O deformation.<sup>1-4</sup> No vanadyl stretching mode, corresponding to ν(V<sup>4+</sup>=O) or ν(V<sup>5+</sup>=O), are observed around 960 or 1020 cm<sup>-1</sup>.<sup>5</sup>

| Precipitate     | Powder          |                                                 | Assignment                                                                                    |
|-----------------|-----------------|-------------------------------------------------|-----------------------------------------------------------------------------------------------|
| 3200-2800 (br.) | 3200-2800 (br.) | ν(O-H)<br>ν(N-H)                                | O-H stretching in hydrated H <sub>2</sub> O<br>N-H stretching in NH <sub>4</sub> <sup>+</sup> |
| 2151            | 2160            | ν(N-H)                                          | N-H stretching in NH <sub>4</sub> <sup>+</sup>                                                |
| 1904            | 1900            | ν(N-H)                                          | N-H stretching in NH <sub>4</sub> <sup>+</sup>                                                |
| 1710            | 1702            |                                                 |                                                                                               |
| 1655            | 1660            | ν <sub>as</sub> (CO <sub>2</sub> <sup>-</sup> ) | Asymmetric CO <sub>2</sub> <sup>-</sup> stretching                                            |
| 1607            | 1605            |                                                 |                                                                                               |
| 1450            | 1460            | ν <sub>s</sub> (CO <sub>2</sub> <sup>-</sup> )  | Symmetric CO <sub>2</sub> <sup>-</sup> stretching                                             |
| 1400            | 1410            |                                                 |                                                                                               |
| 1400            | 1410            | δ(NH <sub>4</sub> <sup>+</sup> )                | NH <sub>4</sub> <sup>+</sup> deformation                                                      |
| 1315            | 1313            | δ(O-C=O)                                        | O-C=O deformation                                                                             |

Table S2: Band assignments of the main vibrations (expressed in cm<sup>-1</sup>) of the FTIR spectra of the precipitate, formed during the synthesis of the citrato-VO<sup>2+</sup> solution, and the ammonium oxalate powder. The assignments are based on references<sup>1-4</sup>.

### Spectroscopic investigation of the citrato-oxalato-VO<sup>2+</sup> and citrato-VO<sup>2+</sup> gel

Gels of both solutions, obtained by drying at 60 °C, are analysed by FTIR Spectroscopy and compared to those of a VO<sup>2+</sup>-free ammonium citrate gel in Figure S3. A full assignment of the measured absorption bands is reported in Table S4. All spectra show a strong absorption band between 3400 and 2800 cm<sup>-1</sup> due to (i) the O-H stretching mode of H-bonded hydroxyl groups and absorbed H<sub>2</sub>O molecules, (ii) the N-H stretching mode of the ammonium ions and (iii) the C-H stretching mode of the citrate's methylene bridges.<sup>3-5</sup> These absorption bands are broadened by H-bridge formation. For the typical asymmetric and symmetric carboxylate stretch vibrations, differences in the citrato-oxalato-VO<sup>2+</sup> and the citrato-VO<sup>2+</sup> precursor gels are observed. In the presence of oxalate, a first ν<sub>as</sub>(CO<sub>2</sub><sup>-</sup>) appears at 1710 cm<sup>-1</sup> and is associated with the ammonium oxalate present in the citrato-oxalato-VO<sup>2+</sup> precursor.<sup>2</sup> Both the citrato-VO<sup>2+</sup> precursor gel and the gel of the VO<sup>2+</sup>-free ammonium citrate solution have no clear vibration peak at this position. However, in all spectra a similar ν<sub>as</sub>(CO<sub>2</sub><sup>-</sup>) arises around 1590 cm<sup>-1</sup> and is assigned to asymmetric stretch vibrations in the carboxylate groups interacting with (i) VO<sup>2+</sup> in the citrato-oxalato-VO<sup>2+</sup> and the citrato-VO<sup>2+</sup> precursor gel and (ii) the ammonium ion in all the studied gels.<sup>3-5</sup> Again in the presence of oxalate, a first ν<sub>s</sub>(CO<sub>2</sub><sup>-</sup>)

appears at 1441  $\text{cm}^{-1}$  and is associated with the ammonium oxalate present in the citrato-oxalato- $\text{VO}^{2+}$  precursor solution.<sup>2</sup> In the spectra a clear  $\nu_s(\text{CO}_2^-)$  appears around 1400  $\text{cm}^{-1}$  and is assigned to a symmetric stretch vibration of the carboxylate groups interacting with  $\text{VO}^{2+}$  in the citrato-oxalato- $\text{VO}^{2+}$  and the citrato- $\text{VO}^{2+}$  precursor gel.<sup>2-4</sup> The peak at 1400  $\text{cm}^{-1}$  coincides with that of the ammonium deformation, which explains its presence in the spectrum of the  $\text{VO}^{2+}$ -free ammonium citrate gel. In all spectra, two peaks assigned to the C-O stretching mode in C-OH are observed around 1120 and 1070  $\text{cm}^{-1}$ .<sup>2-4</sup> The vanadyl stretching mode,  $\nu(\text{V}^{4+}=\text{O})$ , is observed in the gels associated with the citrato-oxalato- $\text{VO}^{2+}$  and the citrato- $\text{VO}^{2+}$  precursor solution at 960  $\text{cm}^{-1}$ , indicating the presence of the oxovanadate species in each precursor solution.<sup>6</sup> Moreover, the absence of  $\text{VO}_2^+$  species is supported by the absence of the  $\nu(\text{V}^{5+}=\text{O})$  stretching mode around 1020  $\text{cm}^{-1}$ .<sup>5</sup> In conclusion, the presence of the citrato- $\text{VO}^{2+}$  complexes and the ammonium groups linking the excess citrate, is suggested by the FTIR spectra of the citrato-oxalato- $\text{VO}^{2+}$  and citrato- $\text{VO}^{2+}$  precursor gels. Vibrations owing to the oxalate residues are observed in the spectra of the citrato-oxalato- $\text{VO}^{2+}$  precursor gel, but not in the citrato- $\text{VO}^{2+}$  precursor gel, which proofs that oxalate is indeed removed during the precipitation step in the synthesis of the oxalate-poor citrato- $\text{VO}^{2+}$  solution.

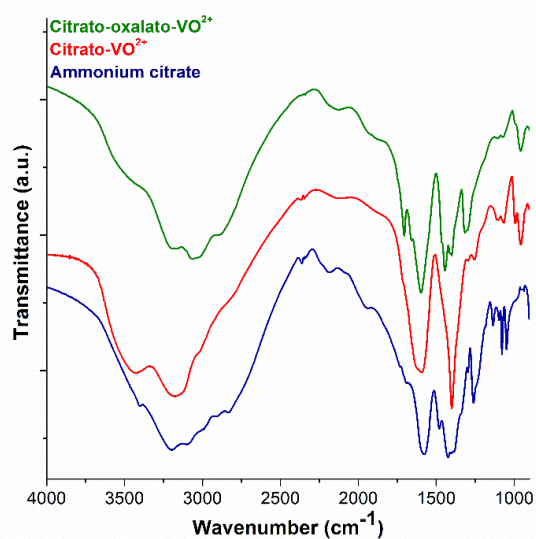

Figure S3: FTIR spectra of gels of the aqueous citrato-oxalato- $\text{VO}_2^+$ , citrato- $\text{VO}_2^+$  and ammonium citrate solutions obtained after drying at 60 °C.

| (1)             | (2)             | (3)             | Assignment                       |                                                                                                |
|-----------------|-----------------|-----------------|----------------------------------|------------------------------------------------------------------------------------------------|
| 3400-2800 (br.) | 3400-2800 (br.) | 3400-2800 (br.) | $\nu(\text{O-H})$                | O-H stretching in C-OH and $\text{H}_2\text{O}$                                                |
|                 |                 |                 | $\nu(\text{N-H})$                | N-H stretching in $\text{NH}_4^+$                                                              |
|                 |                 |                 | $\nu(\text{C-H})$                | C-H stretching in $\text{CH}_2$                                                                |
| 2142 1902       | 2153 1907       | 2150 1904       | $\nu(\text{N-H})$                | N-H stretching in $\text{NH}_4^+$                                                              |
| 1708            | -               | -               | $\nu_{\text{as}}(\text{CO}_2^-)$ | Asymmetric $\text{CO}_2^-$ stretching in $(\text{NH}_4)_2\text{C}_2\text{O}_4$                 |
| 1595            | 1587            | 1594            | $\nu_{\text{as}}(\text{CO}_2^-)$ | Asymmetric $\text{CO}_2^-$ stretching interacting with $\text{VO}^{2+}$ and/or $\text{NH}_4^+$ |
| 1441            | -               | -               | $\nu_s(\text{CO}_2^-)$           | Symmetric $\text{CO}_2^-$ stretching in $(\text{NH}_4)_2\text{C}_2\text{O}_4$                  |
| 1400            | 1402            | 1402            | $\nu_s(\text{CO}_2^-)$           | Symmetric $\text{CO}_2^-$ stretching interacting with $\text{VO}^{2+}$                         |
| 1119 1076       | 1115 1067       | 1138 1078       | $\delta(\text{NH}_4^+)$          | $\text{NH}_4^+$ deformation                                                                    |
|                 |                 |                 | $\nu(\text{C-O})$                | C-O stretching in C-OH doublet                                                                 |
| 960             | 960             | -               | $\nu(\text{V}^{4+}=\text{O})$    | $\text{V}^{4+}=\text{O}$ stretching                                                            |

Table S4: Band assignments of the main vibrations (expressed in  $\text{cm}^{-1}$ ) of the FTIR spectra of the citrato-oxalato- $\text{VO}^{2+}$  (1) citrato- $\text{VO}^{2+}$  (2) and  $\text{VO}^{2+}$ -free ammonium citrate (3) gels. The assignments are based on references<sup>1-5</sup>.

## References

1. M. Cadene and A. Fournel, *J. Mol. Struct.*, 1977, **37**, 35–57.
2. R. L. Frost, *Anal. Chim. Acta*, 2004, **517**, 207–214.
3. K. Nakamoto, *Infrared and Raman Spectra of Inorganic and Coordination Compounds - Part B: Applications in Coordination, Organometallic, and Bioinorganic Chemistry*, John Wiley & Sons Inc., New York, 5th edn., 1997.
4. E. Pretsch, P. Bühlmann, and M. Badertscher, *Structure Determination of Organic Compounds: Tables of Spectral Data*, Springer-Verlag Berlin Heidelberg, 4th edn., 2009.
5. C. Djordjevic, M. Lee, and E. Sinn, *Inorg. Chem.*, 1989, **28**, 719–723.
6. N. Peys, Y. Ling, D. Dewulf, S. Gielis, C. De Dobbelaere, D. Cuypers, P. Adriaensens, S. Van Doorslaer, S. De Gendt, A. Hardy, and M. K. Van Bael, *Dalt. Trans.*, 2013, **42**, 959–968.
